# Supplementary material
Source: publisher figshare collection journal article supplement (https://acs.figshare.com/ndownloader/files/4277238)
Supplement: Supplementary file 1 [file 4277238]

data_PN_C1_test11_re-rt
  
 _journal_coden_Cambridge         ?

_publ_requested_journal   
'Journal of Physical Chemistry Letters'

loop_
_publ_author_name

'Pance Naumov'
'Nobuo Ishizawa'
'Jun Wang'
'Sang Cheol Lee'
'Shunichi Fukuzumi'

_publ_contact_author_name      'Pance Naumov'
_publ_contact_author_address     
;
Department of Material and Life Science
Graduate School of Engineering, 
Osaka University, 
2-1 Yamada-oka, 
Suita, Osaka 565-0871
JAPAN
;

_publ_contact_author_email  npance@wakate.frc.eng.osaka-u.ac.jp

_publ_section_title              
;
Study of the Thermochromism of Polycyclic Overcrowded 
Enes by High-Temperature X-Ray Diffraction
;
 
_audit_creation_method       'Manual editing of SHELXL-97'
_chemical_name_systematic
;
 2-(thioxanthen-9-ylidene)indane-1,3-dione
;
_chemical_name_common             ?
_chemical_melting_point           ?
_chemical_formula_moiety        'C22 H12 O2 S'
_chemical_formula_sum
 'C22 H12 O2 S'
_chemical_formula_weight          340.38
 
loop_
 _atom_type_symbol
 _atom_type_description
 _atom_type_scat_dispersion_real
 _atom_type_scat_dispersion_imag
 _atom_type_scat_source
 'C'  'C'   0.0033   0.0016
 'International Tables Vol C Tables 4.2.6.8 and 6.1.1.4'
 'H'  'H'   0.0000   0.0000
 'International Tables Vol C Tables 4.2.6.8 and 6.1.1.4'
 'O'  'O'   0.0106   0.0060
 'International Tables Vol C Tables 4.2.6.8 and 6.1.1.4'
 'S'  'S'   0.1246   0.1234
 'International Tables Vol C Tables 4.2.6.8 and 6.1.1.4'
 
_symmetry_cell_setting          Monoclinic
_symmetry_space_group_name_H-M   P21/n
 
loop_
 _symmetry_equiv_pos_as_xyz
 'x, y, z'
 '-x+1/2, y+1/2, -z+1/2'
 '-x, -y, -z'
 'x-1/2, -y-1/2, z-1/2'
 
_cell_length_a                    9.4963(5)
_cell_length_b                    8.0181(4)
_cell_length_c                    21.3804(9)
_cell_angle_alpha                 90.00
_cell_angle_beta                  94.107(3)
_cell_angle_gamma                 90.00
_cell_volume                      1623.77(14)
_cell_formula_units_Z             4
_cell_measurement_temperature     296(2)
 
_exptl_crystal_description       'prism'
_exptl_crystal_colour             'orange'
_exptl_crystal_size_max           0.18
_exptl_crystal_size_mid           0.10
_exptl_crystal_size_min           0.10
_exptl_crystal_density_meas       'not measured'
_exptl_crystal_density_diffrn     1.392
_exptl_crystal_density_method     'not measured'
_exptl_crystal_F_000              704
_exptl_absorpt_coefficient_mu     0.211
_exptl_absorpt_correction_type    'empirical'
_exptl_absorpt_correction_T_min   0.9630
_exptl_absorpt_correction_T_max   0.9792
_exptl_absorpt_process_details    'APEX2-W2K/NT (Bruker, 2006)'
 
_exptl_special_details
;
Thermochromic crystal. Sample 
heated to 487 K and cooled in capillary. 
;
 
_diffrn_ambient_temperature       296(2)
_diffrn_radiation_wavelength      0.71073
_diffrn_radiation_type            MoK\a
_diffrn_radiation_source          'sealed tube'
_diffrn_radiation_monochromator   graphite
_diffrn_measurement_device_type   'Bruker APEX diffractometer'
_diffrn_measurement_method        '\w scans' 
_diffrn_detector_area_resol_mean  ?
_diffrn_standards_number          ?
_diffrn_standards_interval_count  ?
_diffrn_standards_interval_time   ?
_diffrn_standards_decay_%         ?
_diffrn_reflns_number             6914
_diffrn_reflns_av_R_equivalents   0.0626
_diffrn_reflns_av_sigmaI/netI     0.0693
_diffrn_reflns_limit_h_min        -9
_diffrn_reflns_limit_h_max        10
_diffrn_reflns_limit_k_min        -8
_diffrn_reflns_limit_k_max        8
_diffrn_reflns_limit_l_min        -23
_diffrn_reflns_limit_l_max        23
_diffrn_reflns_theta_min          1.91
_diffrn_reflns_theta_max          23.25
_reflns_number_total              2321
_reflns_number_gt                 1424
_reflns_threshold_expression      >2sigma(I)
 
_computing_data_collection        'APEX2-W2K/NT (Bruker, 2006)'
_computing_cell_refinement        'APEX2-W2K/NT (Bruker, 2006)'
_computing_data_reduction         'APEX2-W2K/NT (Bruker, 2006)'
_computing_structure_solution     'SHELXS-97 (Sheldrick, 2008)' 
_computing_structure_refinement   'SHELXL-97 (Sheldrick, 2008)' 
_computing_molecular_graphics     'DIAMOND (Brandenburg, 2005)'
_computing_publication_material   'WinGX (Farrugia, 1999)'
 
_refine_special_details
;
 Refinement of F^2^ against ALL reflections.  The weighted R-factor wR and
 goodness of fit S are based on F^2^, conventional R-factors R are based
 on F, with F set to zero for negative F^2^. The threshold expression of
 F^2^ > 2sigma(F^2^) is used only for calculating R-factors(gt) etc. and is
 not relevant to the choice of reflections for refinement.  R-factors based
 on F^2^ are statistically about twice as large as those based on F, and R-
 factors based on ALL data will be even larger.
;
 
_refine_ls_structure_factor_coef  Fsqd
_refine_ls_matrix_type            full
_refine_ls_weighting_scheme       calc
_refine_ls_weighting_details
 'calc w=1/[\s^2^(Fo^2^)+(0.0365P)^2^+0.8898P] where P=(Fo^2^+2Fc^2^)/3'
_atom_sites_solution_primary      direct
_atom_sites_solution_secondary    difmap
_atom_sites_solution_hydrogens    geom
_refine_ls_hydrogen_treatment     mixed
_refine_ls_extinction_method      SHELXL
_refine_ls_extinction_coef        0.0017(8)
_refine_ls_extinction_expression
 'Fc^*^=kFc[1+0.001xFc^2^\l^3^/sin(2\q)]^-1/4^'
_refine_ls_number_reflns          2321
_refine_ls_number_parameters      227
_refine_ls_number_restraints      0
_refine_ls_R_factor_all           0.0994
_refine_ls_R_factor_gt            0.0518
_refine_ls_wR_factor_ref          0.1246
_refine_ls_wR_factor_gt           0.1010
_refine_ls_goodness_of_fit_ref    1.012
_refine_ls_restrained_S_all       1.012
_refine_ls_shift/su_max           0.000
_refine_ls_shift/su_mean          0.000
 
loop_
 _atom_site_label
 _atom_site_type_symbol
 _atom_site_fract_x
 _atom_site_fract_y
 _atom_site_fract_z
 _atom_site_U_iso_or_equiv
 _atom_site_adp_type
 _atom_site_occupancy
 _atom_site_symmetry_multiplicity
 _atom_site_calc_flag
 _atom_site_refinement_flags
 _atom_site_disorder_assembly
 _atom_site_disorder_group
S1 S 0.74008(14) 0.71955(14) 0.22960(5) 0.0718(5) Uani 1 1 d . . .
O1 O 1.1810(3) 0.7008(4) 0.12721(12) 0.0641(8) Uani 1 1 d . . .
O2 O 0.8083(3) 0.8570(4) -0.02051(12) 0.0722(9) Uani 1 1 d . . .
C8A C 0.7431(4) 0.9085(5) 0.12126(16) 0.0430(9) Uani 1 1 d . . .
C9 C 0.8958(4) 0.8704(4) 0.12389(16) 0.0415(9) Uani 1 1 d . . .
C9' C 0.9674(4) 0.8214(4) 0.07371(15) 0.0403(9) Uani 1 1 d . . .
C4A C 0.9060(4) 0.8162(5) 0.23799(18) 0.0550(11) Uani 1 1 d . . .
C9A' C 1.1077(4) 0.7324(5) 0.08005(18) 0.0459(10) Uani 1 1 d . . .
C6' C 1.0270(4) 0.7146(4) -0.02579(17) 0.0471(10) Uani 1 1 d . . .
C8 C 0.6751(4) 1.0132(5) 0.07688(17) 0.0518(11) Uani 1 1 d . . .
H8 H 0.7277 1.0666 0.0478 0.062 Uiso 1 1 calc R . .
C9A C 0.9679(4) 0.8837(4) 0.18670(16) 0.0440(10) Uani 1 1 d . . .
C1 C 1.0941(4) 0.9720(5) 0.19686(18) 0.0553(11) Uani 1 1 d . . .
H1 H 1.1333 1.0228 0.1631 0.066 Uiso 1 1 calc R . .
C10A C 0.6631(4) 0.8371(5) 0.16700(17) 0.0552(11) Uani 1 1 d . . .
C1' C 1.1373(4) 0.6736(4) 0.01662(17) 0.0462(10) Uani 1 1 d . . .
C5' C 1.0276(5) 0.6711(5) -0.08840(18) 0.0605(12) Uani 1 1 d . . .
H5' H 0.9530 0.6988 -0.1170 0.073 Uiso 1 1 calc R . .
C8A' C 0.9161(4) 0.8047(5) 0.00620(17) 0.0474(10) Uani 1 1 d . . .
C2' C 1.2536(4) 0.5854(5) -0.0018(2) 0.0605(12) Uani 1 1 d . . .
H2' H 1.3278 0.5560 0.0268 0.073 Uiso 1 1 calc R . .
C5 C 0.5152(5) 0.8593(6) 0.1629(2) 0.0698(13) Uani 1 1 d . . .
H5 H 0.4602 0.8065 0.1912 0.084 Uiso 1 1 calc R . .
C7 C 0.5321(5) 1.0394(6) 0.0751(2) 0.0676(13) Uani 1 1 d . . .
H7 H 0.4889 1.1116 0.0456 0.081 Uiso 1 1 calc R . .
C4' C 1.1443(6) 0.5844(5) -0.1067(2) 0.0699(14) Uani 1 1 d . . .
H4' H 1.1481 0.5532 -0.1485 0.084 Uiso 1 1 calc R . .
C3 C 1.1035(7) 0.9077(7) 0.3054(2) 0.0899(17) Uani 1 1 d . . .
H3 H 1.1510 0.9116 0.3450 0.108 Uiso 1 1 calc R . .
C3' C 1.2542(5) 0.5438(5) -0.0642(2) 0.0723(14) Uani 1 1 d . . .
H3' H 1.3313 0.4865 -0.0780 0.087 Uiso 1 1 calc R . .
C2 C 1.1612(5) 0.9853(6) 0.2554(2) 0.0756(14) Uani 1 1 d . . .
H2 H 1.2446 1.0459 0.2615 0.091 Uiso 1 1 calc R . .
C4 C 0.9768(6) 0.8248(6) 0.2972(2) 0.0775(15) Uani 1 1 d . . .
H4 H 0.9383 0.7743 0.3312 0.093 Uiso 1 1 calc R . .
C6 C 0.4537(5) 0.9593(7) 0.1168(2) 0.0788(15) Uani 1 1 d . . .
H6 H 0.3562 0.9728 0.1139 0.095 Uiso 1 1 calc R . .
 
loop_
 _atom_site_aniso_label
 _atom_site_aniso_U_11
 _atom_site_aniso_U_22
 _atom_site_aniso_U_33
 _atom_site_aniso_U_23
 _atom_site_aniso_U_13
 _atom_site_aniso_U_12
S1 0.0991(10) 0.0556(7) 0.0659(7) 0.0035(6) 0.0411(7) -0.0109(7)
O1 0.0555(18) 0.079(2) 0.0575(18) -0.0015(16) -0.0014(15) 0.0138(16)
O2 0.068(2) 0.097(2) 0.0508(17) -0.0050(16) -0.0024(15) 0.0272(18)
C8A 0.041(2) 0.042(2) 0.047(2) -0.0107(19) 0.0119(19) -0.011(2)
C9 0.043(2) 0.037(2) 0.046(2) 0.0050(17) 0.0099(18) -0.0084(18)
C9' 0.038(2) 0.041(2) 0.042(2) 0.0042(18) 0.0080(17) -0.0044(19)
C4A 0.075(3) 0.046(3) 0.045(2) 0.000(2) 0.017(2) 0.008(2)
C9A' 0.048(3) 0.041(2) 0.050(2) 0.0036(19) 0.012(2) -0.009(2)
C6' 0.061(3) 0.035(2) 0.048(2) 0.0025(19) 0.023(2) -0.003(2)
C8 0.046(3) 0.059(3) 0.051(2) -0.010(2) 0.007(2) 0.000(2)
C9A 0.048(3) 0.039(2) 0.046(2) -0.0048(18) 0.0068(19) 0.003(2)
C1 0.061(3) 0.054(3) 0.049(2) -0.005(2) -0.001(2) 0.007(2)
C10A 0.063(3) 0.049(3) 0.056(2) -0.009(2) 0.023(2) -0.008(2)
C1' 0.046(2) 0.042(2) 0.053(2) 0.0035(19) 0.020(2) 0.000(2)
C5' 0.079(3) 0.051(3) 0.054(3) -0.001(2) 0.021(2) -0.001(2)
C8A' 0.048(3) 0.049(3) 0.046(2) 0.008(2) 0.007(2) -0.001(2)
C2' 0.055(3) 0.054(3) 0.075(3) 0.006(2) 0.025(2) 0.004(2)
C5 0.060(3) 0.067(3) 0.087(3) -0.022(3) 0.037(3) -0.021(3)
C7 0.052(3) 0.082(4) 0.068(3) -0.022(3) 0.003(2) 0.002(3)
C4' 0.105(4) 0.051(3) 0.058(3) -0.006(2) 0.035(3) -0.009(3)
C3 0.112(5) 0.099(4) 0.056(3) -0.011(3) -0.016(3) 0.037(4)
C3' 0.085(4) 0.061(3) 0.076(3) -0.004(3) 0.041(3) 0.001(3)
C2 0.077(3) 0.074(3) 0.074(3) -0.018(3) -0.010(3) 0.009(3)
C4 0.114(4) 0.069(3) 0.052(3) 0.008(3) 0.017(3) 0.027(3)
C6 0.048(3) 0.094(4) 0.095(4) -0.029(3) 0.007(3) -0.004(3)
 
_geom_special_details
;
 All esds (except the esd in the dihedral angle between two l.s. planes)
 are estimated using the full covariance matrix.  The cell esds are taken
 into account individually in the estimation of esds in distances, angles
 and torsion angles; correlations between esds in cell parameters are only
 used when they are defined by crystal symmetry.  An approximate (isotropic)
 treatment of cell esds is used for estimating esds involving l.s. planes.
;
 
loop_
 _geom_bond_atom_site_label_1
 _geom_bond_atom_site_label_2
 _geom_bond_distance
 _geom_bond_site_symmetry_2
 _geom_bond_publ_flag
S1 C10A 1.753(4) . ?
S1 C4A 1.753(4) . ?
O1 C9A' 1.210(4) . ?
O2 C8A' 1.211(4) . ?
C8A C8 1.391(5) . ?
C8A C10A 1.403(5) . ?
C8A C9 1.479(5) . ?
C9 C9' 1.368(4) . ?
C9 C9A 1.467(5) . ?
C9' C8A' 1.496(5) . ?
C9' C9A' 1.509(5) . ?
C4A C9A 1.390(5) . ?
C4A C4 1.392(5) . ?
C9A' C1' 1.482(5) . ?
C6' C1' 1.375(5) . ?
C6' C5' 1.384(5) . ?
C6' C8A' 1.484(5) . ?
C8 C7 1.372(5) . ?
C9A C1 1.395(5) . ?
C1 C2 1.367(5) . ?
C10A C5 1.412(5) . ?
C1' C2' 1.392(5) . ?
C5' C4' 1.388(5) . ?
C2' C3' 1.375(5) . ?
C5 C6 1.368(6) . ?
C7 C6 1.363(6) . ?
C4' C3' 1.373(6) . ?
C3 C4 1.375(6) . ?
C3 C2 1.384(6) . ?
 
loop_
 _geom_angle_atom_site_label_1
 _geom_angle_atom_site_label_2
 _geom_angle_atom_site_label_3
 _geom_angle
 _geom_angle_site_symmetry_1
 _geom_angle_site_symmetry_3
 _geom_angle_publ_flag
C10A S1 C4A 99.38(19) . . ?
C8 C8A C10A 118.3(4) . . ?
C8 C8A C9 123.8(3) . . ?
C10A C8A C9 117.9(3) . . ?
C9' C9 C9A 120.9(3) . . ?
C9' C9 C8A 124.8(3) . . ?
C9A C9 C8A 114.3(3) . . ?
C9 C9' C8A' 129.5(3) . . ?
C9 C9' C9A' 123.4(3) . . ?
C8A' C9' C9A' 105.6(3) . . ?
C9A C4A C4 119.6(4) . . ?
C9A C4A S1 121.3(3) . . ?
C4 C4A S1 119.1(3) . . ?
O1 C9A' C1' 124.1(4) . . ?
O1 C9A' C9' 128.7(3) . . ?
C1' C9A' C9' 107.0(3) . . ?
C1' C6' C5' 121.4(4) . . ?
C1' C6' C8A' 110.2(3) . . ?
C5' C6' C8A' 128.4(4) . . ?
C7 C8 C8A 121.4(4) . . ?
C4A C9A C1 118.8(4) . . ?
C4A C9A C9 119.9(4) . . ?
C1 C9A C9 121.2(3) . . ?
C2 C1 C9A 121.4(4) . . ?
C8A C10A C5 119.4(4) . . ?
C8A C10A S1 122.3(3) . . ?
C5 C10A S1 118.3(3) . . ?
C6' C1' C2' 121.2(4) . . ?
C6' C1' C9A' 110.0(3) . . ?
C2' C1' C9A' 128.8(4) . . ?
C6' C5' C4' 117.3(4) . . ?
O2 C8A' C6' 123.7(4) . . ?
O2 C8A' C9' 129.0(3) . . ?
C6' C8A' C9' 107.2(3) . . ?
C3' C2' C1' 117.1(4) . . ?
C6 C5 C10A 119.4(4) . . ?
C6 C7 C8 119.7(4) . . ?
C3' C4' C5' 121.1(4) . . ?
C4 C3 C2 120.7(5) . . ?
C4' C3' C2' 121.9(4) . . ?
C1 C2 C3 119.2(5) . . ?
C3 C4 C4A 120.1(4) . . ?
C7 C6 C5 121.4(4) . . ?
 
loop_
 _geom_torsion_atom_site_label_1
 _geom_torsion_atom_site_label_2
 _geom_torsion_atom_site_label_3
 _geom_torsion_atom_site_label_4
 _geom_torsion
 _geom_torsion_site_symmetry_1
 _geom_torsion_site_symmetry_2
 _geom_torsion_site_symmetry_3
 _geom_torsion_site_symmetry_4
 _geom_torsion_publ_flag
C8 C8A C9 C9' -49.1(5) . . . . ?
C10A C8A C9 C9' 132.1(4) . . . . ?
C8 C8A C9 C9A 132.9(4) . . . . ?
C10A C8A C9 C9A -45.9(4) . . . . ?
C9A C9 C9' C8A' -178.0(3) . . . . ?
C8A C9 C9' C8A' 4.1(6) . . . . ?
C9A C9 C9' C9A' 18.0(5) . . . . ?
C8A C9 C9' C9A' -159.9(3) . . . . ?
C10A S1 C4A C9A -31.5(3) . . . . ?
C10A S1 C4A C4 148.7(3) . . . . ?
C9 C9' C9A' O1 -5.1(6) . . . . ?
C8A' C9' C9A' O1 -172.4(4) . . . . ?
C9 C9' C9A' C1' 169.7(3) . . . . ?
C8A' C9' C9A' C1' 2.4(4) . . . . ?
C10A C8A C8 C7 -3.7(5) . . . . ?
C9 C8A C8 C7 177.5(3) . . . . ?
C4 C4A C9A C1 -5.8(5) . . . . ?
S1 C4A C9A C1 174.4(3) . . . . ?
C4 C4A C9A C9 178.1(4) . . . . ?
S1 C4A C9A C9 -1.7(5) . . . . ?
C9' C9 C9A C4A -133.6(4) . . . . ?
C8A C9 C9A C4A 44.5(5) . . . . ?
C9' C9 C9A C1 50.4(5) . . . . ?
C8A C9 C9A C1 -131.5(4) . . . . ?
C4A C9A C1 C2 3.6(6) . . . . ?
C9 C9A C1 C2 179.7(4) . . . . ?
C8 C8A C10A C5 6.4(5) . . . . ?
C9 C8A C10A C5 -174.7(3) . . . . ?
C8 C8A C10A S1 -173.8(3) . . . . ?
C9 C8A C10A S1 5.1(5) . . . . ?
C4A S1 C10A C8A 29.8(3) . . . . ?
C4A S1 C10A C5 -150.4(3) . . . . ?
C5' C6' C1' C2' -0.4(6) . . . . ?
C8A' C6' C1' C2' 178.8(3) . . . . ?
C5' C6' C1' C9A' -179.0(3) . . . . ?
C8A' C6' C1' C9A' 0.3(4) . . . . ?
O1 C9A' C1' C6' 173.4(4) . . . . ?
C9' C9A' C1' C6' -1.8(4) . . . . ?
O1 C9A' C1' C2' -5.0(6) . . . . ?
C9' C9A' C1' C2' 179.9(3) . . . . ?
C1' C6' C5' C4' -0.1(5) . . . . ?
C8A' C6' C5' C4' -179.2(4) . . . . ?
C1' C6' C8A' O2 179.0(4) . . . . ?
C5' C6' C8A' O2 -1.8(6) . . . . ?
C1' C6' C8A' C9' 1.3(4) . . . . ?
C5' C6' C8A' C9' -179.5(4) . . . . ?
C9 C9' C8A' O2 13.9(7) . . . . ?
C9A' C9' C8A' O2 -179.9(4) . . . . ?
C9 C9' C8A' C6' -168.5(3) . . . . ?
C9A' C9' C8A' C6' -2.3(4) . . . . ?
C6' C1' C2' C3' 1.0(6) . . . . ?
C9A' C1' C2' C3' 179.2(4) . . . . ?
C8A C10A C5 C6 -4.3(6) . . . . ?
S1 C10A C5 C6 175.9(3) . . . . ?
C8A C8 C7 C6 -1.3(6) . . . . ?
C6' C5' C4' C3' 0.0(6) . . . . ?
C5' C4' C3' C2' 0.6(7) . . . . ?
C1' C2' C3' C4' -1.0(6) . . . . ?
C9A C1 C2 C3 0.9(6) . . . . ?
C4 C3 C2 C1 -3.1(7) . . . . ?
C2 C3 C4 C4A 0.9(7) . . . . ?
C9A C4A C4 C3 3.6(6) . . . . ?
S1 C4A C4 C3 -176.6(4) . . . . ?
C8 C7 C6 C5 3.5(7) . . . . ?
C10A C5 C6 C7 -0.7(7) . . . . ?
C9A C9 C9' C8A 177.9(6) . . . . ?
C9A' C9 C9' C8A' 164.0(6) . . . . ?
 
_diffrn_measured_fraction_theta_max    0.998
_diffrn_reflns_theta_full              23.25
_diffrn_measured_fraction_theta_full   0.998
_refine_diff_density_max    0.293
_refine_diff_density_min   -0.362
_refine_diff_density_rms    0.044

#======================================================================
 
# TEXT
 
_publ_section_synopsis
;
;
 
_publ_section_abstract
;
; 
_publ_section_comment
;
;
 
_publ_section_exptl_prep
;
;
 
_publ_section_exptl_refinement
;
;
 
_publ_section_references
;
APEX2-W2K/NT, v1.0; Bruker Analytical X-ray Systems Inc.:
Madison, WI, 2006.

Sheldrick, G. M. (2008). <i>Acta Cryst.</i> A<b>64</b>, 112--122.

Brandenburg, K (2005). DIAMOND (Version 3.1). Crystal Impact GbR, Bonn, Germany.

Farrugia, L. J. (1999). Win-GX (Version 1.70.01). 
<i>J. Appl. Cryst.<b>32</b>, 837--838.

;

#======================================================================
